# Supplementary material
Source: ML conference proceedings conference paper supplement (https://www.ecva.net/papers/eccv_2022/papers_ECCV/html/136670227_ECCV_2022_paper.php)
Supplement: Supplementary file 1 [file 136670227-supp.zip]

Archive with 4 entries (4 files):
- results.mp4
- __MACOSX/._results.mp4
- 4547-supp.pdf
- __MACOSX/._4547-supp.pdf
